# Supplementary material for: PP2A inhibitors arrest G2/M transition through JNK/Sp1-dependent down-regulation of CDK1 and autophagy-dependent up-regulation of p21
Source: Oncotarget. 2015 May 25;6(21):18469–83. doi: 10.18632/oncotarget.4063 (PMC4621904; doi:10.18632/oncotarget.4063)
Supplement: Supplementary file 1 [file oncotarget-06-18469-s001.pdf]

## SUPPLEMENTARY FIGURES

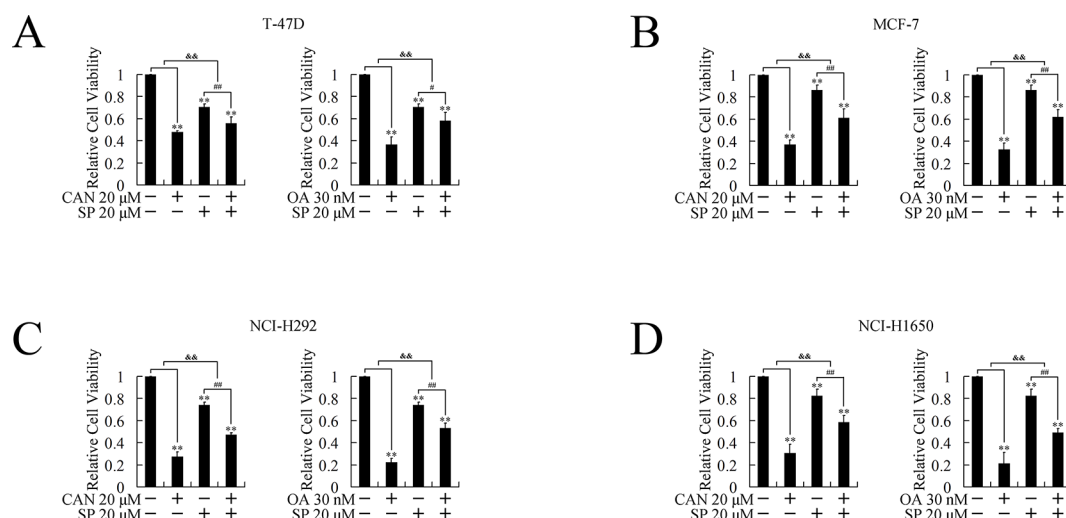

**Supplementary Figure 1: JNK pathway dependent cytotoxicity of PP2A inhibitors.** Breast cancer cell lines, T-47D **A.** and MCF-7 **B.** and lung cancer cell lines NCI-H292 **C.** and NCI-H1650 **D.** were pretreated with SP600125 for 3 h, followed by PP2A inhibitor treatment for 72 h. MTT assays were used to evaluate cell viability. \* $P < 0.05$ , \*\* $P < 0.01$  vs. respective control groups; # $P < 0.05$ , ## $P < 0.01$  vs. SP600125 group; & $P < 0.05$ , && $P < 0.01$  induction between groups.

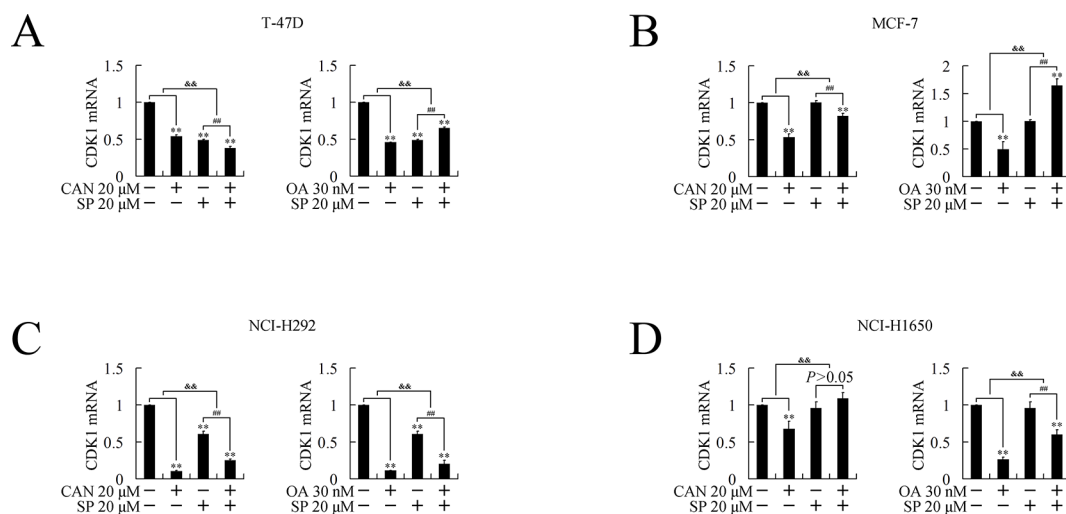

**Supplementary Figure 2: JNK pathway dependent repression of CDK1 by PP2A inhibitors.** After pretreatment with the JNK inhibitor, SP600125, for 3 h, PP2A inhibitors were added into the culture. T-47D **A.** MCF-7 **B.** NCI-H292 **C.** and NCI-H1650 **D.** cells were then treated for 24 h. Real-time PCR was used to evaluate mRNA levels of CDK1. \* $P < 0.05$ , \*\* $P < 0.01$  vs. respective control groups; # $P < 0.05$ , ## $P < 0.01$  vs. SP600125 group; & $P < 0.05$ , && $P < 0.01$  induction between groups.

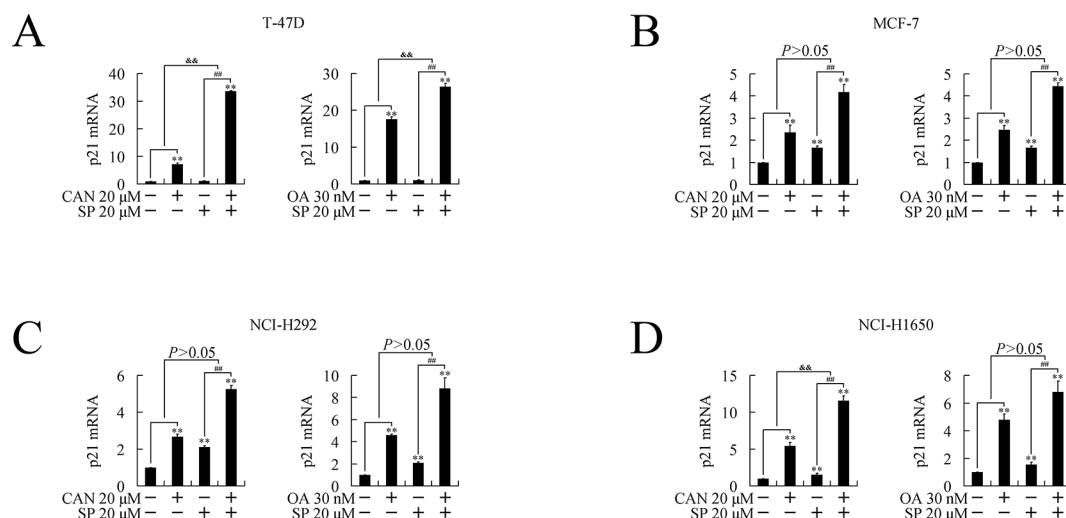

**Supplementary Figure 3: JNK pathway independent up-regulation of p21 by PP2A inhibitors.** After pretreatment with the JNK inhibitor, SP600125, for 3 h, PP2A inhibitors were added into the culture. T-47D **A**, MCF-7 **B**, NCI-H292 **C**, and NCI-H1650 **D**, cells were then treated for 24 h. Real-time PCR was used to evaluate mRNA levels of p21. \* $P < 0.05$ , \*\* $P < 0.01$  vs. respective control groups; # $P < 0.05$ , ## $P < 0.01$  vs. SP600125 group; & $P < 0.05$ , && $P < 0.01$  induction between groups.

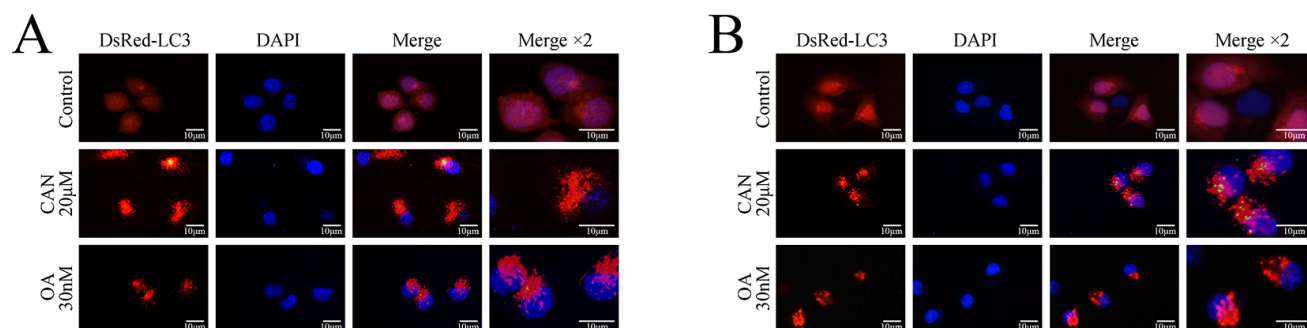

**Supplementary Figure 4: Induction of autophagy by cantharidin and OA.** T-47D **A**, and MCF-7 **B**, cells were treated with cantharidin or OA for 24 h. Formation of LC3 puncta were visualized with fluorescence microscope.

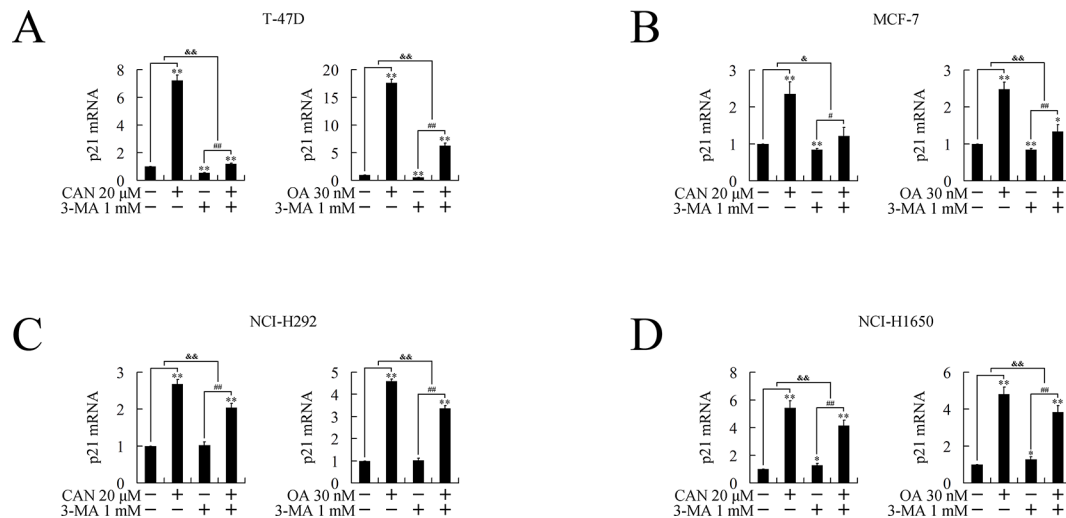

**Supplementary Figure 5: Autophagic pathway dependent up-regulation of p21 by PP2A inhibitors.** After pretreatment with 3-MA for 3 h, PP2A inhibitors were added into the culture. T-47D **A**, MCF-7 **B**, NCI-H292 **C**, and NCI-H1650 **D**, cells were treated for another 24 h. Real-time PCR was used to evaluate mRNA levels of p21. \* $P < 0.05$ , \*\* $P < 0.01$  vs. respective control groups; # $P < 0.05$ , ## $P < 0.01$  vs. SP600125 group; & $P < 0.05$ , && $P < 0.01$  induction between groups.
